# Supplementary material for: Hydrological modelling and future runoff of the Damma Glacier CZO watershed using SWAT. Validation of the model in the greater area of the Göscheneralpsee, Switzerland
Source: Copernicus journal article supplement (doi:10.5194/hess-2018-493), 2018-10-17
Supplement: Supplementary file [file hess-2018-493-AC6-supplement.pdf]

Dear Editor,

We would like to thank you and the reviewers for your very constructive comments, that led to a significant improvement of this manuscript. Here we discuss the revisions that we made in response to your reviews and we hope that we addressed all the comments and issues raised by the reviewers.

Firstly, in response to the comment from reviewer 1, G. Thirel, that the title is not very fitting, we suggest a change in the title, if this is possible. The suggested new title is: “Assessment of SWAT spatial and temporal transferability for high altitude glacierised catchments”. In addition, we updated in the manuscript one of the coauthors` affiliation. The structure of the manuscript was modified in order to address the main issue raised by the reviewers and concerns the goal of this study and to clarify methodological choices. Two new sections were added; one called Methodology and the second Model setup, calibration and validation. The abstract, introduction and conclusions were completely revised as well as other sections of the text. Figures 1 and 2 as well as 3 and 4 were combined in two new ones, that better describe the study site and the calibration data. A Table was also added with the new analysis data.

Below you will find our answers to the reviewers. A manuscript with all the changes is submitted together with this letter. Please note that the line and Figures numbers have been modified and that we refer to the new numbers in the responses below.

Yours sincerely

Maria Andrianaki (on behalf of all authors)

## Reviewer 1

Dear Reviewer G. Thirel, thank you for your review and constructive comments. I hope that we answer all your remarks.

**Reviewer:** “The paper by Andrianaki et al. deals with a topic of interest for HESS readers: the modelling of runoff in a glacierised catchments and projections of its evolution. The manuscript reads easily and is concise; I would like to thank the authors for that, as it is often not the case and readers are burdened with loads of not so useful information in many papers. That said, I feel that there is room for improvement before the paper reads as a scientific paper. Here are my **main remarks**.

1) The main criticism is that I failed to identify clearly what the readers could bring home from this manuscript. Definitely not a new methodology, as the SWAT model is basically used as is, the sensitivity test is not detailed and the calibration and climate change exercises are classical. In my opinion, results are also not so remarkable. It is very interesting to see the validation exercise on a different period and then on a different catchment, but in the end we have results about one catchment and the calibration period is very short. As a consequence, we could wonder if we have the right answer for the right reason or not. I find it very difficult to extrapolate anything from results on this catchment for further works.

If the main additional value of the paper is the fact that SWAT works for this area, then this should be better highlighted and put into perspective with relevant literature. This reflects on the objectives of the study, which are barely presented in the paper and makes it look like an application of the model rather than an actual research work. Only lines 51-52 give some elements on the interest of this work. Consistently, the conclusions only briefly highlight one novelty of the study (L. 354). In my opinion, the abstract, the introduction and the conclusions should be clear about the novelty of this work.”

**Authors:** You are right that probably we didn't explain clearly enough the objectives of this study.

One of the challenges that researchers in hydrological modelling face is the lack of data for model setup and calibration in ungauged watersheds. Especially in high mountainous regions a big part of the watersheds is ungauged. In the last years, there is an increasing interest in applying SWAT on snow-dominated (Grousseau et al., 2015) and glacierised watersheds (Omani et al., 2017; Rahman et al., 2013). However, its transposability and its application for the simulation of runoff in high altitude ungauged watersheds hasn't been tested yet.

Our study area is characterised by extreme climatic conditions, high altitude and steep slopes. Here, we have a quite unique situation; a small well gauged watershed monitored through the CZO projects, which is part of a larger watershed, for which we have hydrological data thanks to its use by the hydroelectric power plant. This gives us the opportunity to verify the

applicability of SWAT under extreme conditions and its transferability on spatial and temporal scale, by using the small Damma watershed (10.5 km<sup>2</sup>) as the gauged watershed and the greater area feeding the Göschenalpsee reservoir (100 km<sup>2</sup>) as an ungauged catchment. We used the approach of spatial proximity and transferred the calibrated parameters of the model from the donor watershed, which in this case is the Damma glacier watershed, to the greater area. By comparing the model results with the existing measurements provided by the managers of the reservoir, we were able to test whether the model can eventually be transposed and applied efficiently on a different spatial scale, and where its advantages and disadvantages lie.

Finally, we conducted the climate change simulations, not to do another set of classical climate change exercises, but to investigate whether SWAT can be further transposed on a temporal scale, since we could compare our findings with those of a previous study for the same area, which used two other hydrological models with different characteristics, PREVAH and Alpine 3D (Kobierska et al., 2013).

In addition, the Damma Glacier watershed is a Critical Zone Observatory part of the Critical Zone Exploration Network, a global network of field sites investigating the physical, chemical and biological processes of the critical zone ([www.czen.org](http://www.czen.org)). Because CZOs are well studied sites and usually have long records of data, we wanted to show how they can be used in water management, since they could serve as parameter donor catchments.

Our results presented in the manuscript, as well as further analysis suggested by the Editor (please see our response to the Editor), showed that SWAT can predict satisfactorily runoff after being upscaled and applied in different scales, even under alpine conditions. This approach, which doesn't require complex regionalisation methods, can be quite useful in water management and climate change studies, considering the fact that SWAT is a widely used model, even in large scale simulations (Pagliero et al, 2014). The performance of the model could be further improved if different rates of glacier melt and snowmelt had been applied.

In the revised manuscript we have rewritten a big part of the abstract and introduction, adding relevant literature, discussing all the above with more detail and explaining the objectives in a clear way. In the conclusions paragraph we discussed in a more critical and constructive way about the performance of the model and how it could be improved and the conclusions from the comparison between the models and the climate change study.

Reviewer: "2) It is, if I'm not wrong, never clearly stated that calibration of SWAT is done compared to discharge observations only. Calibration is mentioned many times (abstract, end of introduction, section 3.3) but the used observation is not given. SWAT is physically based and snow observations are definitely an additional value to models calibration in snowy areas, so it is legitimate to wonder if the authors used any kind of snow data here."

Authors: The model was calibrated against measured runoff of the Damma watershed, which is described in paragraph 3.2.4. Comparison of the measured runoff with the results of the model after the calibration is given in Fig. 2 (former Fig.3), page 19. Small corrections were made in the text to make this clearer.

Data for the evolution of the glacier were available for the whole area (paragraph 3.2.5) provided by Paul et al., 2007 and snow density and snow depth measurements were available for the Damma watershed only. We used the evolution of the glacier to define the initial glacier storage for each elevation band of each subbasin. We didn't use it for the calibration of the model because we wanted to test the performance of the model following a simpler approach that would be familiar to the majority of SWAT users and that would also relate to studies with data scarcity where snow measurements are not available. We also think that the best way to improve SWAT performance in this case would be to take into account the difference between snowmelt and glacier melt dynamics. Omani et al. (2017) addressed this issue by applying different snow parameters to the completely glacierised subbasins. However, the subbasins of the Damma glacier watershed were all partly glacierised so we couldn't follow this approach.

Reviewer: "3) The calibration set up is unclear and at some point, flawed to me. First, we don't know exactly what the objective function is: authors introduce NS and  $R^2$  but they don't specify how they used them: through a composite criterion? With a Pareto front? Then, the use of NS in snowfed basins is not advised. Indeed, this criterion relates the performance to the mean observed discharge, which is a bad predictor in such a seasonally variable environment (see Schaepli and Gupta (2007)). It also underestimates discharge variability. Finally, we don't know how the parameters from the small basin are transferred to the larger one. Are some of these parameters time or scale dependent? It is just said that they are adjusted.

4) The structure of section 4.1 is not easy to follow. Some kind of sensitivity test is done to identify which parameters to calibrate. I failed to understand if it was done by the authors, and if yes I don't understand why it is mentioned only in the third paragraph, so after talking about the values of the calibrated parameters. Also, the word "set" is often used to refer to parameters; as it is unclear what is meant since both a manual calibration and an automatic one are mentioned, I got a bit lost.

In addition, authors seem to infer that Table 1 shows the results of a sensitivity test. What I rather see here is how different the calibrated values are from the default ones, some of them being unrealistic maybe (I don't know where they come from). L. 239: which ones are the least sensitive ones?"

Authors: Initially we conducted the calibration manually because we wanted to identify the parameters that really influence the hydrology of the site. For the manual calibration both NS and  $R^2$  were checked but again manually. After the manual calibration we used SWAT-CUP

software and the program SUFI-2 (Sequential Uncertainty Fitting version 2) (Abbaspour et al., 2007) for the automated calibration (fine tuning) and the sensitivity analysis. The manual calibration helped us in defining which parameters will be calibrated by SUFI-2 as well as their range. For example, because our site is above the tree line, evapotranspiration is not significant, and ET related parameters were left to their default values. For the SUFI-2 NS objective function was chosen because it was the criterion available in SUFI-2, which is most commonly used in similar studies.

Table 1 doesn't show the sensitivity test. It shows the default and calibrated values of the parameters that were introduced into SUFI2 and were calibrated. The sensitivity test showed that these parameters are indeed the most sensitive ones. Some of these values are very different from the default ones probably because our watershed is characterised by extreme conditions. For example, due to its topography (very steep slopes) and geology Damma watershed has a very fast response which led to the high value of ALPHA\_BF and the low value of GW\_DELAY.

The input data of SWAT include topography, landuse and soil maps and during the initial delineation of the watershed many parameters are given a value based on these data. This a priori parameterisation assisted the use of the model for the bigger area. Then the calibrated parameters were applied to the bigger area with the same values that resulted from the calibration without any regionalisation procedure or another adjustment. We decided to do that because the Damma watershed and the greater area are very similar.

After receiving your review, we calculated the Benchmark Efficiency according to Schaefli and Gupta (2007) and for the period 2009-2011 the BE value is 0.22 and for 2012-2015 the BE is 0.25. The calculation of BE is included now in the revised text. Furthermore, more detail was added in the calibration paragraph to make it better understood. The calibration, criteria, sensitivity analysis and results are presented altogether in section 5.

Reviewer: "5) The actual setup of this whole study is not justified by the authors. Why is the model calibrated on the small basin that has few data and validated on the large basin with a lot of data rather than the opposite?"

Authors: As mentioned above, in this study we have a quite unique situation; a small well gauged watershed monitored through the CZO projects, which is part of a larger watershed, for which we have hydrological data thanks to its use by the hydroelectric power plant. This way we wanted to check the application of SWAT in high altitude basins and its upscaling to ungauged catchments in alpine conditions. Since we already had the climate change study with Alpine 3D and PREVAH for the bigger area, we calibrated the model for the small watershed and transferred it to the bigger. In the revised text we explain this further by adding more detail in the Abstract, Introduction and conclusion as well as in the added section 4 Methodology.

Reviewer: “6) L. 304: I thought that the black (reference) curve in Fig. 7 should be the same as the SWATcurve in Fig. 6, but it does not seem so. Did I get something wrong? The resolution of Fig. 7 could be improved, it is more difficult to read than Fig. 6.”

Authors: You are right. There is an error in the text, (former line 284) now in line 366. In Figure 4 (former Fig. 6) the interannual average is for the period 1997-2010 and not 1981–2010 mentioned in the text. The caption of Fig.6 is correct. In Fig. 5 (former Fig.7) the reference period is 1981-2010. Former Figures 6 and Figures 7 were redone and are now Fig. 4 and 5.

Reviewer: “7) L. 317: the authors state that the volume of the glacier reduces to half in 2070. I wonder how this is considered in the SWAT model. Indeed, I expect that the initial conditions of the model (due to the Delta method used for producing the climate projections a continuous hydrological projection cannot be done) had to be adjusted. How was that done? Also, please precise who estimated this reduction (authors? Literature?).”

Authors: Line 402 – 403. We have data for the evolution of the glacier for both future periods provided by Paul et al. (2007). Based on this, the initial glacier storage was calculated, and the SWAT was setup for each climate change scenario. According to the data of the evolution of the glaciers the glacier volume will be reduced in our site approximately to half by 2070. The sentence was rephrased to explain this better.

Minor remarks:

Reviewer: “Title: The title is not very sexy... Also CZO is an acronym, is it well known enough to be used in a title?”

Authors: Indeed, the title is not very sexy. We suggest another title could be “Assessment of SWAT spatial and temporal transferability for high altitude glacierised catchments”. CZO is removed from the title.

Reviewer: “L. 30, 32 and many other places: a space is missing after the semi-colon.”

Authors: Corrected

Reviewer: “L. 31: I think that the lack of observed data of sufficient quality could also be mentioned.”

Authors: Done. Currently L. 38

Reviewer: “Section 2: what is the surface area of the small watershed? It is only given for the larger one.”

Authors: The area of the small watershed is 10.5 km<sup>2</sup>. Now it is added in the text. L. 75

Reviewer: “L. 60: after “(Fig. 1)” I think that “is” is missing.”

Authors: Done, Figure 1 was merged with Figure 2

Reviewer: "L. 62: inconsistent (lack of) space between number and unit."

Authors: Corrected

Reviewer: "L. 69, 74...: why is "et al." suddenly in italics?"

Authors: Corrected

Reviewer: "L. 77: I would add a comma after "interface""

Authors: Corrected

Reviewer: "L. 135: strange punctuation after "Climate change scenarios"

Authors: Corrected, L.150

Reviewer: L. 149-150: are the parentheses necessary around Delta P and Delta T? "(Bosshard et al. 2011)" should be "Bosshard et al. (2011)"

Authors: Corrected, L. 155

Reviewer:L. 158: I would add "scenarios" after "SMHI"

Authors: Added, L. 165

Reviewer:L. 164: if I got it right, Delta P close to 1 mean no change. Is it correct?

Authors: Yes

Reviewer:L. 172: "extenT"

Authors: Corrected, L. 187

Reviewer: L. 211: what you have done is a proxy-basin sample test according to the well-known paper Klemes (1986). This is not done so often, I recommend citing this paper

Authors: You are right that our approach is similar to the proxy basin sample test suggested by Klemes (1986) and we added this paper in the introduction together with a short description of the test in section 4.

Reviewer:L. 220: "temperatureS"

Authors: Corrected, L. 241

Reviewer:L. 225: I would add a comma after "September"

Authors: Corrected

Reviewer:L. 302: I also see a shift of the peak for the far future

Authors: The sentence in L.302 was deleted because it was not clear enough.

Reviewer:L. 320: “snow-fre”

Authors: Corrected

Reviewer:L. 323: using the future is a bit too categorical. There are some uncertainties in projections.

Authors: Some sentences were rephrased to emphasize that these are predictions. L.382 - 435

Reviewer:L. 360: any ideas about these other uses? I think this is of interest for the readers.

Authors: This approach could be used in the simulation of runoff in high altitude ungauged catchments with limited data or in large scale simulations with SWAT. Big part of the conclusions, now section 7, was rephrased to explain this in a better way.

Reviewer: L. 428: Farinotti et al. (2012) is given twice. L. 471: Viviroli et al. (2004) has been published, please update L. 480: “SIMULATION1”: what is this “1”?

Authors: Errors in the references were corrected

Reviewer: Table 1: space or no space between “mm” and “H2O”? In the caption, I would place “SWAT parameters” just after “sensitive”

Authors: Corrected

Reviewer: Fig. 1 and 2: scale and north direction are missing. I would skip “The Damma Glacier CZO” on top of Fig. 1.

Authors: Figures 1 and 2 were combined in one. L. 644

Reviewer: Fig. 3 and others: months are not given in English (“Dez”). I would also like to see each time in the caption the catchment of interest and the period.

Authors: Former Figures 3 and 4 were combined in 1 and is now Figure 2. Sorry for not noticing about the months that are not in English. It is corrected. The captions were corrected to include catchment and period. The graph with the results from the default parameters was deleted

Reviewer: Fig. 5: panel (a) is too small for the long period given; it hides potential serious mismatches between simulation and observations.

Authors: Figure 3 (former Fig. 5) We tried to apply a different colour scheme and it is slightly improved.

Reviewer: Fig. 6: is it 1981 as in the text or 1987? Is that an interannual mean? Please comment why SWAT underestimates low flows.

Authors: Figure 4 (former Fig. 6) The caption is correct. The 1981 in the text was wrong but now is corrected. It is true that SWAT underestimates low flows and this discussion is added



in the revised manuscript L. 344 - 359. The Damma glacier watershed is characterised by very steep slopes (even up to nearly 80 degrees) and runoff originates mainly from snowmelt, glacier melt and rainfall (Magnuson et al., 2012). Consequently, the watershed is characterised by very fast response, which in terms of the model parameters resulted on the high value of ALPHA\_BF and the low value of the GW\_Delay. On the other hand, the Göschenalpsee feeding area is less steep on average and maybe the interactions between groundwater and surface runoff must be more significant than those of the Damma watershed. Furthermore, two out of the four watersheds of the greater area are drained into the reservoir through tunnels, which undoubtedly influence the low flow measurements of the reservoir. These factors explain why the model, which is calibrated for the Damma watershed, doesn't simulate successfully the low flows of the greater area.

## References

- Abbaspour, K. C., Yang, J., Maximov, I., Siber, R., Bogner, K., Mieleitner, J., Zobrist, J., and Srinivasan, R.: Modelling hydrology and water quality in the pre-alpine/alpine Thur watershed using SWAT, *J. Hydrol.*, 333, 413-430, <http://dx.doi.org/10.1016/j.jhydrol.2006.09.014>, 2007.
- Grusson, Y., Sun, X., Gascoin, S., Sauvage, S., Raghavan, S., Anctil, F., and Sánchez-Pérez, J.-M.: Assessing the capability of the SWAT model to simulate snow, snow melt and streamflow dynamics over an alpine watershed, *J. Hydrol.*, 531, 574-588, <http://dx.doi.org/10.1016/j.jhydrol.2015.10.070>, 2015.
- Omani, N., Srinivasan, R., Karthikeyan, R., and Smith, P.: Hydrological Modeling of Highly Glacierized Basins (Andes, Alps, and Central Asia), *Water*, 9, 111, 2017.
- Paul, F., Maisch, M., Rothenbühler, C., Hoelzle, M., and Haerberli, W.: Calculation and visualisation of future glacier extent in the Swiss Alps by means of hypsographic modelling, *Global and Planetary Change*, 55, 343-357, <https://doi.org/10.1016/j.gloplacha.2006.08.003>, 2007.
- Pagliero, L., Bouraoui, F., Willems, P., and Diels, J.: Large-Scale Hydrological Simulations Using the Soil Water Assessment Tool, Protocol Development, and Application in the Danube Basin, *Journal of Environmental Quality*, 43, 145-154, <http://dx.doi.org/10.2134/jeq2011.0359>, 2014.
- Rahman, K., Maringanti, C., Beniston, M., Widmer, F., Abbaspour, K., and Lehmann, A.: Streamflow Modeling in a Highly Managed Mountainous Glacier Watershed Using SWAT: The Upper Rhone River Watershed Case in Switzerland, *Water Resour. Manag.*, 27, 323-339, [10.1007/s11269-012-0188-9](https://doi.org/10.1007/s11269-012-0188-9), 2013.

[www.czen.org](http://www.czen.org)

## Reviewer 2

Dear Anonymous referee, thank you for your review and very constructive comments.

### General remarks

Reviewer: Even though the paper is about important issues in hydrology (model complexity, impact of climate change), the current version has several flaws. As pointed out by Guillaume Thirel, its main goal is not clearly stated. You state that SWAT "has rarely been used for high alpine areas" and imply to study the suitability of SWAT for such environment. This is not completely true, as SWAT has been widely used in mountainous regions during the last decade (see for example Rahman et al. 2013, references within and papers citing it). The authors should carefully streamline the main goal of the paper.

Authors: You are right that the main goal of the paper is not clear. In this manuscript, we wanted to show not only the applicability of SWAT on a glacierised watershed but also to assess its transferability in different spatial and temporal scale and subsequently to test whether it can be applied on a high altitude glacierised ungauged watershed for runoff simulation and climate change simulations. This is something that hasn't been done before with SWAT but can be quite useful in water management considering the fact that SWAT is a widely used model, used even in large scale simulations (Pagliero et al, 2014).

It is true that in the last years there is an increasing interest in the application of SWAT in high mountainous areas and since a big part of the watersheds in these regions is ungauged, we believe that our study can contribute towards this direction. In our site we have the opportunity to test the upscaling of the model, because we have a quite unique situation; a small well gauged watershed monitored through the CZO projects, which is part of a larger watershed and for which we have hydrological data thanks to its use for the hydroelectric power plant. This gives us the opportunity to verify the model with independently collected data on the large watershed.

We have rewritten the abstract and conclusions, and extended the introduction focusing on the points mentioned above in order to make our objectives clearer. We also added relevant literature to put them into perspective.

Reviewer: A second major problem is the lack of references or justifications throughout the text. You make strong statements without justifying them or explaining why you made that choice. Here are a few examples:

- The calibration and validation periods are both very short (line 181-183). Why have you chosen such a limited period?

Authors: The reason why the calibration and validation periods are short is that for the Damma glacier watershed we had runoff data for the period 2009-2013. Probably it would be best if we had used these runoff data only for calibration and omitted the validation step, but the performance of the calibration is the same as the calibration and therefore we think that it wouldn't make any difference. In addition, this period is short, but it still includes a relatively large variability in the weather conditions and precipitation amounts. For example, it includes a rather wet year and hot summer and dry and warm autumn.

Reviewer: You estimate the glacier retreat during the last 90 years (line 63-64) without any reference. Where does it come from?

Authors: Damma glacier watershed is a well studied site. Glacier retreat was estimated in previous studies described in Bernasconi et al., 2008 and Bernasconi et al., 2011 (already cited in the paragraph) using systematic recordings.

Reviewer: • Climate models (line 147-151): why have you chosen these 3 models out of the 10 available in CH2011? is there any reason?

Authors: We used these three models, because they were the ones in common with both ALPINE3D and PREVAH.

Reviewer: To the best of my knowledge, the CH2011 scenarios (based on the delta change method) were not suitable for assessing changes in extreme events. Based on which element, are you stating an increase in extreme events (Line 342-343)?

Authors: What we meant is that predicted runoff of the far future period T2 shows higher fluctuations from year to year than that of the near future period especially from September to October. Sentence is rephrased.

Reviewer: You are making strong assertions based on the Nash-Sutcliffe model efficiency throughout the paper (line 197-198, 250-251, 259, 268), but be careful, because this indicator strongly depends on the hydrological regime (Schaeffli and Gupta, 2007). In alpine basins where you have a strong annual cycle, a NSE coefficient of 0.49 is rather bad and not satisfactory as you state. When comparing averaged models results (Figure 6, line 284-292), based on which elements (objective/subjective) can you say that the performance of SWAT is comparable to PREVAH and Alpine3D? I personally do not agree based on the NSE coefficients you provided.

Some of the SWAT parameters seem to be scale-dependent (in time and space), which could partly explain the model performance deterioration. You should somehow discuss which parameters are the most sensitive in space (validation over the Göschneneralpsee) and in time (with regard to climate scenarios). In addition, you are using different soil and landuse maps

in the Damma and Göschneneralpsee catchments (Line114-122). For me, this choice is a bit risky as you upscale your parameters and could bring some inconsistency

Authors: In response to your comment and the comment by the Editor, we investigated further the predictive power of the model for the greater catchment by comparing the observed data with the model results for the spring snowmelt timing, timing of highest flow, autumn recession period and the centre of mass (COM). To do this analysis we used the 15-day average of the daily runoff. Results are presented in Fig. 1 and 2 and the Table 1 given below.

The model predicts efficiently the spring snowmelt timing and the autumn recession period. The difference between the COM of the observed and the simulated runoff, which is given in Table 1 here (Table 2 in the manuscript), is low and for some years close to zero, which is also satisfactory. The main inconsistencies between measured and simulated data are observed for the general timing of the highest peak, Fig. 2 (Table 2 in the manuscript).

One of the reasons for the deterioration of the model is that it doesn't differentiate between snow and glacier dynamics and only one parameter for both snowmelt and glacier melt rates is applied. This becomes more important in our study, since there is a difference between the glacier coverage of the two catchments. The Damma glacier is 50% covered by the glacier while the greater catchment is 20%.

One more reason is the difference in the response of the Damma glacier watershed in comparison to the greater area. Damma is characterised by very steep slopes (even up to nearly 80 degrees) and runoff originates mainly from snowmelt, glacier melt and rainfall (Magnuson et al., 2012). For this reason, the small watershed is characterised by very fast response, which led to the high value of ALPHA\_BF and the low value of the GW\_Delay parameters. On the other hand, the Göschneneralpsee feeding area is less steep on average and for the two out of the four of its watersheds, runoff is drained through tunnels into the reservoir.

The most sensitive parameters are the ones related to the snowmelt, like SFTMP, SMTMP and TIMP. During the manual calibration we checked many of the parameters related to landuse and soils and we think that we do not have an inconsistency. The parameter values set during the delineation of the watershed and initial parameterisation should be adequate. Finally, because our site is above tree line evapotranspiration parameters are not significant.

It is true that comparing SWAT with Alpine3D and PREVAH is tricky since they were calibrated for different catchments and different periods of time. The NS efficiency and the benchmark efficiency BE (added in the revised text) for the calibration period only are: 0.85 and 0.19 respectively for ALPINE3D, 0.91 and 0.49 for PREVAH and 0.84 and 0.22 for SWAT. These

efficiencies of Alpine 3D and SWAT are in good agreement, with the efficiencies of PREVAH being slightly higher.

We have rewritten the entire paragraph for the comparison of the models. We focused less on comparing the efficiency of the model and mainly on what we can conclude from the comparison between the three models.

### Minor remarks

Reviewer: Some typos are visible throughout the paper, the authors should carefully proofread it. Here are some minor comments:

Authors: Corrected

Reviewer: 1. Line 44: what do you mean by "its structure is physically based"? For me, Alpine3D is a physically based model, SWAT is not. Please clarify!

Authors: It really depends on how you define the term "physically based". Some researchers consider SWAT to be a physically based model and others don't since not all of its parameters can be defined directly by measurements. Since it wasn't adding to the context, the sentence was deleted.

Reviewer: 2. Line 98: what do you mean exactly by this statement?

Authors: L. 115 (former L. 98) Fontaine et al., (2002) revealed the importance of improving SWAT algorithms to include in the model the influence of elevation and season on the dynamics of the snowpack.

Reviewer: 3. Line 104: "basic input" is a subjective statement.

Authors: Line 122 (former L. 104) "basic" is deleted

Reviewer: Line 124: the new MeteoSwiss network is named SwissMetNet not ANETZ anymore.

Authors: Corrected

Reviewer: 5. Line 1341-134: you are right, lapse rate are critical in mountainous regions, so tell the reader which values you have used in you study!

Authors: Line 148. precipitation lapse rate PLAPS was set to 5 (mm/km) and temperature lapse rate was set to -5.84 (°C/km).

Reviewer: 6. In figure 1, what is the added value of the inset for the present study? There is an inconsistency in the orientation (North) between figure 1 and 2. You should just combine them into a single figure.

Authors: You are right. Figures 1 and 2 were combined to Figure 1.

Reviewer: 7. Figure 3a, is it really useful to show the uncalibrated time series?

Authors: Figures 3 and 4 were combined to one, Figure 2 and the uncalibrated time series was not included.

Reviewer: 8. We can hardly see the difference between the two curves in figure 5a. Consequently, the reader cannot really assess the quality of the model

Authors: A better version of Fig. 5a is given below in Fig. 3. (Fig. 3 in the manuscript). As you can see this Figure, there is an overestimation of the streamflow by the model during the years 2000 to 2002. This overestimation must be related to the runoff melt rate that 1999-2002 was a rather wet period. Furthermore, the simulated runoff peaks are higher and narrower than the observed ones, which must be related to the differences in the response and groundwater interactions between the small watershed and the greater area, as discussed above.

Reviewer: 9. In figure 6, it is somehow hard to make the difference between the lines. Try different colors.

Authors: Figure 6 is Figure 4 in the revised manuscript and a different colour scheme was applied.

## References

Bernasconi, S. M., Christl, I., Hajdas, I., Zimmermann, S., Hagedorn, F., Smittenberg, R. H., Furrer, G., Zeyer, J., Brunner, I., Frey, B., Plotze, M., Lapanje, A., Edwards, P., Venterink, H. O., Goransson, H., Frossard, E., Bunemann, E., Jansa, J., Tamburini, F., Welc, M., Mitchell, E., Bourdon, B., Kretzschmar, R., Reynolds, B., Lemarchand, E., Wiederhold, J., Tipper, E., Kiczka, M., Hindshaw, R., Stahli, M., Jonas, T., Magnusson, J., Bauder, A., Farinotti, D., Huss, M., Wacker, L., Abbaspour, K., and Biglink Project, M.: Weathering, soil formation and initial ecosystem evolution on a glacier forefield: a case study from the Damma Glacier, Switzerland, *Mineral. Mag.*, 72, 19-22, 10.1180/minmag.2008.072.1.19, 2008.

Bernasconi, S. M., Bauder, A., Bourdon, B., Brunner, I., Bunemann, E., Christl, I., Derungs, N., Edwards, P., Farinotti, D., Frey, B., Frossard, E., Furrer, G., Gierga, M., Goransson, H., Gulland, K., Hagedorn, F., Hajdas, I., Hindshaw, R., Ivy-Ochs, S., Jansa, J., Jonas, T., Kiczka, M., Kretzschmar, R., Lemarchand, E., Luster, J., Magnusson, J., Mitchell, E. A. D., Venterink, H. O., Plotze, M., Reynolds, B., Smittenberg, R.

H., Stahli, M., Tamburini, F., Tipper, E. T., Wacker, L., Welc, M., Wiederhold, J. G., Zeyer, J., Zimmermann, S., and Zumsteg, A.: Chemical and Biological Gradients along the Damma Glacier Soil Chronosequence, Switzerland, *Vadose Zone J.*, 10, 867-883, <http://dx.doi:10.2136/vzj2010.0129>, 2011.

Kobierska, F., Jonas, T., Zappa, M., Bavay, M., Magnusson, J., and Bernasconi, S. M.: Future runoff from a partly glacierized watershed in Central Switzerland: A two-model approach, *Advances in Water Resources*, 55, 204-214, <http://dx.doi.org/10.1016/j.advwatres.2012.07.024>, 2013.

Pagliero, L., Bouraoui, F., Willems, P., and Diels, J.: Large-Scale Hydrological Simulations Using the Soil Water Assessment Tool, Protocol Development, and Application in the Danube Basin, *Journal of Environmental Quality*, 43, 145–154, <http://dx.doi:10.2134/jeq2011.0359>, 2014.

Table 1 Difference of the centre of mass (COM) and autumn recession period in days, calculated from the 15-day average.

| <b>Year</b> | <b>COM</b> | <b>Autumn<br/>recession<br/>period</b> |
|-------------|------------|----------------------------------------|
| 1997        | 6.8        | 1                                      |
| 1998        | 4.2        | 1                                      |
| 1999        | 1.0        | 0                                      |
| 2000        | 3.0        | 16                                     |
| 2001        | 0.6        | 1                                      |
| 2002        | 7.8        | 19                                     |
| 2003        | 0.6        | 5                                      |
| 2004        | 2.4        | 4                                      |
| 2005        | 4.3        | 0                                      |
| 2006        | 4.1        | 1                                      |
| 2007        | 8.1        | 1                                      |
| 2008        | 3.1        | 0                                      |
| 2009        | 4.6        | 0                                      |
| 2010        | 6.0        | 0                                      |

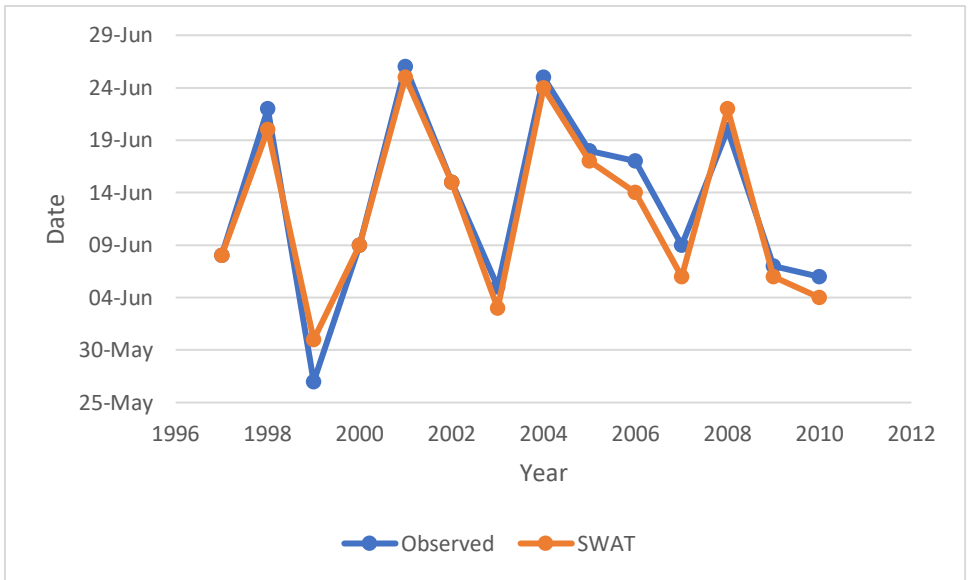

Figure 1 Comparison between the observed and simulated spring snowmelt timing. A 15-day average filter was applied on daily measurements.

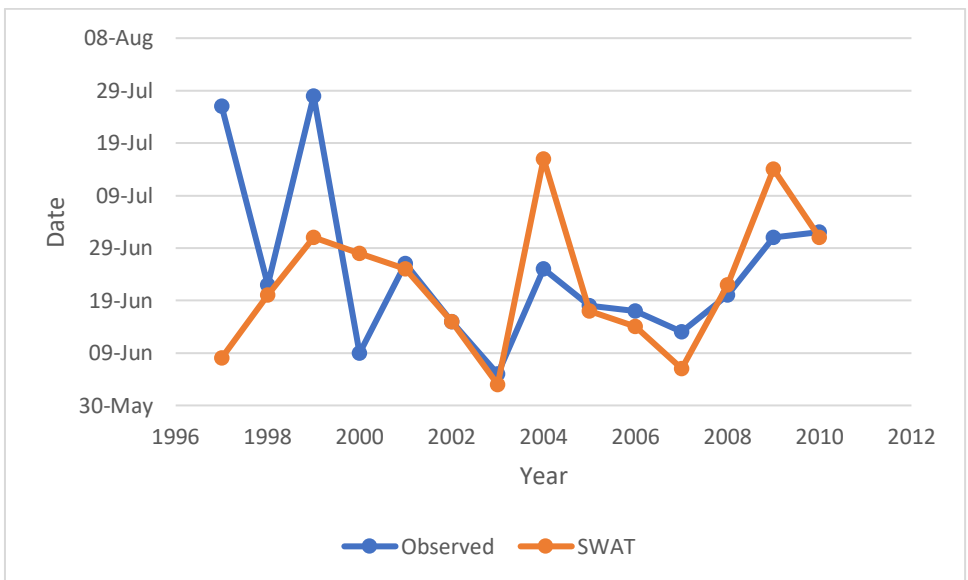

Figure 2 Comparison between the observed and simulated spring snowmelt timing. A 15-day average filter was applied on daily measurements.



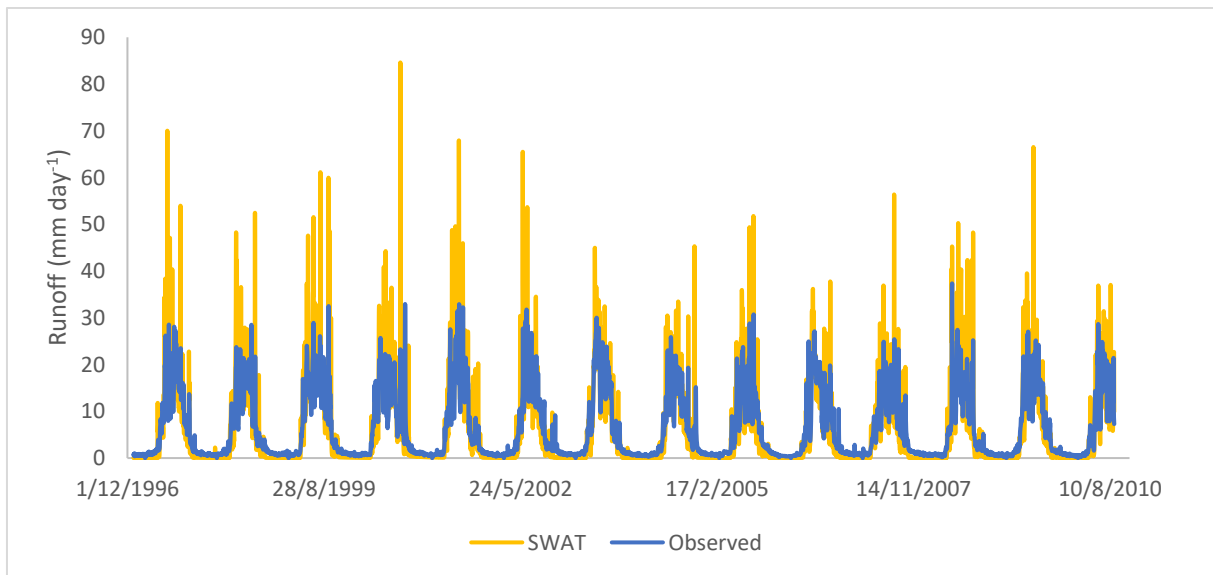

Figure 3(Figure 3a in manuscript) SWAT results and measured runoff values of the feeding catchment of the Göscheneralpsee for the period 1997-2010
